# Supplementary material
Source: publisher figshare collection journal article supplement (https://adisjournals.figshare.com/ndownloader/files/14137859)
Supplement: Supplementary file 1 [file 14137859]

## EADSG Guidelines: Insulin Storage and Optimisation of Injection Technique in Diabetes Management

Silver, B., Ramaiya K., Andrew, S. B., Fredrick, O., Bajaj, S., Kalra, S., Charlotte, B. M., and Claudine, K. Diabetes Ther. 2019.

This slide deck represents the opinions of the authors. Editorial assistance for this study was provided by by **Dr. Punit Srivastava and Ms. Divya Sadhna of Mediception Science Pvt Ltd**. For a full list of acknowledgments and disclosures for all authors of this article, please see the full text online.  
© The Author(s) 2019.

- Insulin therapy is key in management of diabetes, but the technique of injecting Insulin is poorly understood by many health care providers.
- The East Africa Diabetes Study Group (EADSG) sought a consensus on the recommendation of Insulin injection technique in low resource settings.
- A meeting of experts in managing diabetes, healthcare providers (professionals & workers), and patients with diabetes from the East African region met in Kigali, Rwanda and made recommendations for insulin injection technique, which were based on recommendations from “Forum for Injection Technique and Therapy Expert Recommendations (FITTER)”, Italy 2015.
- The summary of recommendations are given on slide # 2 and being explained in pictorial format in slide # 3.

- Insulin should be transported safely, with no shaking and at temperature of 2 – 8°C.
- Proper instructions to patients should be given on the administration of Insulin. Insulin in use should be kept at room temperature and should never be kept immersed in water to avoid contaminations.
- Shortest possible needles (4-mm for pen and 6-mm for insulin syringe) should be advised for patients; slanting of the needle to be avoided in order to prevent “tattooing” of the skin & scarring. If lifting for a skin fold (pinching of skin) is to be done, patients should be taught the technique of doing so and observed performing the technique appropriately by healthcare provider.
- Re-use of needles and syringes is not recommended, unless extremely necessary.
- Disposal of syringes and needles and other sharps to be done in designated containers, and to be kept in pre-defined areas.

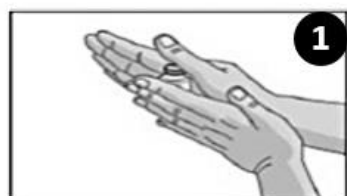

1  
Wash hands, check insulin for lumps, crystals or discoloring. Gently roll between Hands until uniformly cloudy. Never shake insulin.

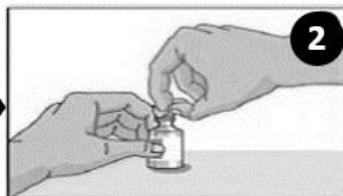

2  
Wipe the top of the insulin bottle with an alcohol swab.

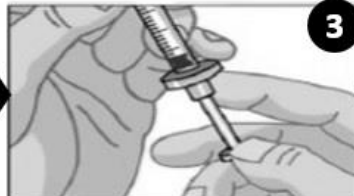

3  
Pull the plunger down to let units of air into the syringe. The units of air should equal the units of insulin that will be drawn.

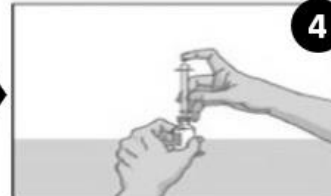

4  
Push the air into the insulin bottle. Leave the needle in the bottle.

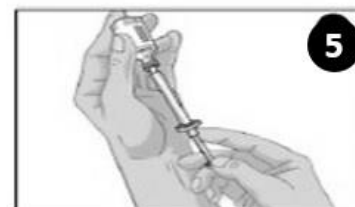

5  
Turn the insulin bottle and syringe upside down. Be sure the needle is in the insulin, not in the airspace inside the bottle. Pull the plunger down to get right units of insulin in the syringe.

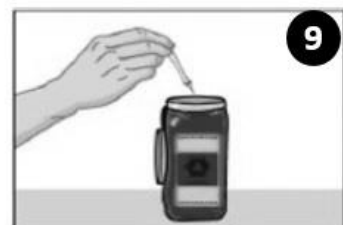

6  
Place the used syringe in a sharps container. Do not reuse the syringe if possible; limit re-use to maximum five times.

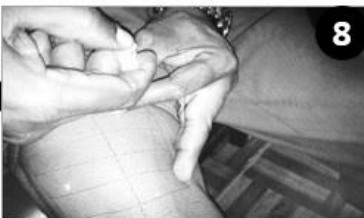

7  
Push plunger to inject insulin. Count from 0-30 (30 seconds) before withdrawing the needle.

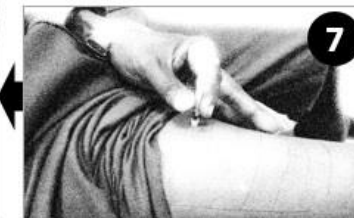

8  
Push needle into skin at 90° angle.

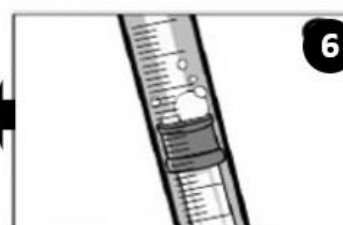

9  
Look for air bubble in syringe. If there are bubbles, push insulin back into bottle. Start again from step 5. When you have the right insulin units with no air bubbles, pull syringe out of the bottle.

## Acknowledgements

The East Africa Diabetes Study Group (EADSG) received an unrestricted study grant from Novo Nordisk towards the hosting of a workshop on insulin injections in Kigali, 11 March 2018. Novo Nordisk had no role in the design of this guideline or its publication. No article processing charges were received by the journal for the publication of this article. All named authors meet the International Committee of Medical Journal Editors (ICMJE) criteria for authorship for this article, take responsibility for the integrity of the work as a whole, and have given their approval for this version to be published. Editorial assistance in the preparation of this article was provided by Dr. Punit Srivastava and Ms. Divya Sadhna of Mediception Science Pvt Ltd.

## Disclosures

Bahendeka Silver, Kaushik Ramaiya, Swai Babu Andrew, Otieno Fredrick, Sarita Bajaj, Sanjay Kalra, Bavuma Charlotte and Karigire Claudine have nothing to disclose.

## Compliance with Ethics Guidelines

This guideline is based on previously conducted studies and does not contain any studies with human participants or animals performed by any of the authors. In drawing up the East Africa Diabetes Study Group (EADSG) Guidelines: Insulin Storage and Optimisation of Injection Technique in Diabetes Management, the authors adhered to the international and ethical standards in compliance with the Uganda National Council of Science and Technology (UNCST) for developing clinical practice guidelines (CPG).

## Copyright

Copyright © The Author(s) 2019.

This slide deck is distributed under the terms of the Creative Commons Attribution 4.0 License which permits any commercial use, distribution, and reproduction in any medium, provided the original author(s) and the source are credited.
